# Supplementary material
Source: ML conference proceedings conference paper supplement (https://proceedings.mlr.press/v84/hickey18a.html)
Supplement: Supplementary file [file hickey18a-supp.pdf]

# 1 Supplementary Material

This will cover the proofs required for checking eigenvalues of a symmetric matrix, checking the symmetric generalised eigenvalue problem and the protocol for fingerprinting the covariance matrix.

## 1.1 Details of Theorem 3

We use the fact that  $\lambda_i \leq \|A\|_2$ , and  $\|v_i\|_2 = 1$ . We also have  $\|r\|_2 \leq \frac{\sqrt{n}}{2}$  and  $|\rho| \leq \frac{1}{2}$ , and so;

$$\begin{aligned}
\|TA\hat{v}_i - \hat{\lambda}_i\hat{v}_i\|_\infty &\leq \sqrt{n}\|TA\hat{v}_i - \hat{\lambda}_i\hat{v}_i\|_2 \\
&= \sqrt{n}\|T^2Av_i + TAr - T^2\lambda_iv_i - T\rho v_i - T\lambda_ir - \rho r\|_2 \\
&\leq \sqrt{n}(T\|A\|_2\|r\|_2 + T|\rho|\|v_i\|_2 + T|\lambda_i|\|r\|_2 + |\rho|\|r\|_2) \\
&\leq Tn\|A\|_F + \frac{T\sqrt{n}}{2} + \frac{n}{4} \\
\|\hat{v}_i^T\hat{v}_j - T^2\delta_{ij}\|_\infty &\leq \sqrt{n}\|\hat{v}_i^T\hat{v}_j - T^2\delta_{ij}\|_2 \\
&\leq \sqrt{n}\|(Tv_i + r)^T(Tv_j + r) - T^2\delta_{ij}\|_2 \\
&\leq \sqrt{n}\|Tv_i^T r + Tr^T v_j + r^T r\|_2 \\
&\leq 2T\sqrt{n}\|r\|_2 + \sqrt{n}\|r\|_2^2 \\
&\leq Tn + \frac{n\sqrt{n}}{4}
\end{aligned}$$

## 1.2 Details of Theorem 4

First define  $\tilde{v}_i = \frac{\hat{v}_i}{T}$ ,  $\tilde{\lambda}_i = \frac{\hat{\lambda}_i}{T}$ , so we have;

$$\frac{\|TA\hat{v}_i - \hat{\lambda}_i\hat{v}_i\|_\infty}{T^2} = \|A\tilde{v}_i - \tilde{\lambda}_i\tilde{v}_i\|_\infty \geq \frac{\|A\tilde{v}_i - \tilde{\lambda}_i\tilde{v}_i\|_2}{\sqrt{n}}$$

As  $A$  is symmetric, we can write  $A = VDV^T$ , where  $V$  is the orthogonal matrix of eigenvectors, and  $D$  is the diagonal matrix of corresponding eigenvalues. Then (using  $VV^T = I$ )

$$\begin{aligned}
\|A\tilde{v}_i - \tilde{\lambda}_i\tilde{v}_i\|_2 &= \|VDV^T\tilde{v}_i - \tilde{\lambda}_i\tilde{v}_i\|_2 \\
&= \|V(D - \tilde{\lambda}_i)V^T\tilde{v}_i\|_2 \\
&= \|(D - \tilde{\lambda}_i)V^T\tilde{v}_i\|_2 \\
&\geq \min_j (|\lambda_j - \tilde{\lambda}_i|) \|V^T\tilde{v}_i\|_2 \\
&= \min_j (|\lambda_j - \tilde{\lambda}_i|) \|\tilde{v}_i\|_2 \\
&\geq \min_j (|\lambda_j - \tilde{\lambda}_i|) \sqrt{1 - \frac{\sqrt{n}}{T} - \frac{n}{4T^2}} \\
&= \min_j (|\lambda_j - \tilde{\lambda}_i|) \sqrt{1 - \frac{1}{2} - \frac{1}{16}} \quad \text{if } \sqrt{n} \leq \frac{T}{2} \\
&\geq \frac{\min_j (|\lambda_j - \tilde{\lambda}_i|)}{2}
\end{aligned}$$

So if we consider  $\epsilon > 0$ , and wish to ensure that  $\min_j (|\lambda_j - \tilde{\lambda}_i|) < \epsilon$ , i.e. there is a (true) eigenvalue close to the approximate eigenvalue, then we can choose a  $T$  based on

$$\begin{aligned} \min_j (|\lambda_j - \tilde{\lambda}_i|) &\leq 2\|A\tilde{v}_i - \tilde{\lambda}_i\tilde{v}_i\|_2 \\ &\leq 2\sqrt{n}\|A\tilde{v}_i - \tilde{\lambda}_i\tilde{v}_i\|_\infty \\ &\leq \frac{2\sqrt{n}\|TA\hat{v}_i - \hat{\lambda}_i\hat{v}_i\|_\infty}{T^2} \\ &\leq \frac{2n\sqrt{n}\|A\|_F}{T} + \frac{n}{T} + \frac{n\sqrt{n}}{2T^2} \quad (\text{using Theorem 3}) \end{aligned}$$

As  $T$  tends to infinity, this bound positively approaches 0, as such, for any  $\epsilon > 0$  we can find a  $T$  s.t. the error in  $\mathbb{R}$  of  $\min_j (|\lambda_j - \tilde{\lambda}_i|)$  will be  $\epsilon$ .

### 1.3 Details of Theorem 8

The Cholesky Decomposition allows us to solve the symmetric generalised eigenvalue problem for  $A, B \in \mathbb{F}_q^{n \times n}$ , with  $A$  symmetric, and  $B$  symmetric positive semi-definite;

$$\text{Find } V, D \in \mathbb{R}^{n \times n} \text{ such that } AV = BVD$$

We do this by finding the Cholesky Decomposition of  $B$ ,  $L$  and then performing finding the eigenvalues of the symmetric matrix  $C = L^{-1}A(L^{-1})^T$  to get matrices  $V', D'$  with  $CV' = V'D'$ .  $D = D'$ , and  $V = L^{-1}V'$  are the solutions we desire.

With our approximations, we use our matrix inversion and Cholesky Decomposition protocols to find, using scaling factor  $T_1$ , we have that  $\hat{C}$  will be in  $\mathbb{F}_{qT_1}^{n \times n}$ .

$$\hat{C} = \widehat{(\hat{L})^{-1}A(\hat{L})^{-1}}^T$$

So we have

$$\begin{aligned} \hat{L}\hat{L}^T &= T_1^2B + E_1 \quad E_1 \in \left[ -\frac{n\|B\|_F}{2T_1}, \frac{n\|B\|_F}{2} \right]^{n \times n} \\ \widehat{(\hat{L})^{-1}} &= T_1I + E_2 \quad E_2 \in \left[ -n\|\hat{B}\|_F - \frac{n^2}{4}, n\|\hat{B}\|_F + \frac{n^2}{4} \right]^{n \times n} \end{aligned}$$

If we receive approximate eigenpairs,  $\hat{U}, \hat{D}$  with diagonal  $\hat{\lambda}$ , of  $\hat{C}$  from the helper, with scaling factor  $T$  giving error  $\epsilon^\delta$ , satisfying

$$\begin{aligned} \|T\hat{C}\hat{U} - \hat{D}\hat{U}\|_{\max} &\leq \left[ Tn\|C\|_F + \frac{T\sqrt{n}}{2} + \frac{n}{4} \right] \\ \|\hat{U}^T\hat{U} - T^2I\|_{\max} &\leq \left[ T\sqrt{n} + \frac{n}{4} \right] \end{aligned}$$

Let  $D^\delta, U^\delta \in \mathbb{R}^{n \times n}$  be the true eigenvalues and eigenvectors of  $\hat{C}$ . So

$$\hat{C}U^\delta = U^\delta D^\delta$$

We know that  $\|TD^\delta - \hat{D}\|_{\max}$  will be at most  $T\epsilon^\delta$ . Furthermore let  $\hat{L}^T V^\delta = U^\delta$ , so

$$\begin{aligned}\hat{C}U^\delta &= U^\delta D^\delta \\ \widehat{(\hat{L})^{-1}A(\hat{L})^{-1}}^T \hat{L}^T V^\delta &= \hat{L}^T V^\delta D^\delta \\ \hat{L} \widehat{(\hat{L})^{-1}A(\hat{L})^{-1}}^T \hat{L}^T V^\delta &= \hat{L} \hat{L}^T V^\delta D^\delta \\ (T_1 I + E_2)A(T_1 I + E_2)^T V^\delta &= (T_1^2 B + E_1) V^\delta D^\delta \\ \left( A + \frac{E_2 A + A E_2^T + E_2 E_2^T}{T_1^2} \right)^T V^\delta &= \left( B + \frac{E_2}{T_1^2} \right) V^\delta D^\delta\end{aligned}$$

By using the eigenvalue perturbation theory [Trefethen and Bau III (1997)], we can say that there exists  $V \in \mathbb{R}^{n \times n}$ ,  $D \in \mathbb{R}^{n \times n}$  with diagonal  $\lambda$ , so

$$\lambda_i = \lambda_i^\delta + v_i^{\delta T} \left( \frac{E_2 A + A E_2^T + E_2 E_2^T}{T_1^2} - \lambda_i^\delta \frac{E_1}{T_1^2} \right) v_i^\delta$$

So

$$\begin{aligned}|\lambda_i - \lambda_i^\delta| &= |v_i^{\delta T} \left( \frac{E_2 A + A E_2^T + E_2 E_2^T}{T_1^2} - \lambda_i^\delta \frac{E_1}{T_1^2} \right) v_i^\delta| \\ &\leq \|v_i^{\delta T}\|_2 \left\| \left( \frac{E_2 A + A E_2^T + E_2 E_2^T}{T_1^2} - \lambda_i^\delta \frac{E_1}{T_1^2} \right) \right\|_2 \|v_i^\delta\|_2 \\ &\leq \left\| \frac{E_2 A + A E_2^T + E_2 E_2^T - \lambda_i^\delta E_1}{T_1^2} \right\|_2 \\ &\leq \frac{\|E_2 A\|_2 + \|A E_2^T\|_2 + \|E_2 E_2^T\|_2 + \|\lambda_i^\delta E_1\|_2}{T_1^2} \\ &\leq \frac{2\|E_2\|_2 \|A\|_2 + \|E_2\|_2^2 + \|\hat{C}\|_2 \|E_1\|_2}{T_1^2} \\ &\leq \frac{2n \left( n\|B\|_2 + \frac{n^2}{4} \right) \|A\|_2 + n^2 \left( n\|B\|_2 + \frac{n^2}{4} \right)^2 + \|\hat{C}\|_2 n \left( \frac{n\|B\|_2}{2} \right)}{T_1^2} \\ &\leq \frac{\left( 2n^2 \|B\|_2 + \frac{n^3}{2} \right) \|A\|_2 + \left( n^4 \|B\|_F^2 + \frac{\|B\|_2 n^5}{2} + \frac{n^6}{16} \right) + \left( \frac{\|\hat{C}\|_2 n^2 \|B\|_2}{2} \right)}{T_1^2} \\ &\leq \frac{\left( 2n^2 \|\hat{B}\|_2 + \frac{n^3}{2} \right) \|A\|_2 + \left( n^4 \|\hat{B}\|_2^2 + \frac{\|B\|_2 n^5}{2} + \frac{n^6}{16} \right) + \left( \frac{\|\hat{C}\|_2 n^2 \|B\|_2}{2} \right)}{T_1^2} \\ &\leq \frac{32n^2 \|B\|_2 \|A\|_2 + 8n^3 \|A\|_2 + 16n^4 \|B\|_2^2 + 8\|B\|_F n^5 + n^6 + 8\|\hat{C}\|_2 n^2 \|B\|_2}{T_1^2}\end{aligned}$$

As,  $A, B \in \mathbb{F}_q$ , we have  $\|A\|_2, \|B\|_2 \leq qn$ ,  $\|\hat{C}\|_2 \leq qnT_1$

$$\begin{aligned} |\lambda_i - \lambda_i^\delta| &\leq \frac{32n^2(nq)^2 + 8n^3nq + 16n^4(nq)^2 + 8nqn^5 + n^6 + 8qnT_1n^2nq}{T_1^2} \\ &\leq \frac{32n^4q^2 + 8n^4q + 16n^6q^2 + 8n^6q + n^6 + 8qnT_1n^3q}{T_1^2} \\ &\leq \frac{8n^4(4q^2 + q) + n^6(16q^2 + 8q + 1) + 8qnT_1n^3q}{T_1^2} \\ &\leq \frac{q^3n^4}{T_1} \end{aligned}$$

If we have that  $q \geq 20$ ,  $n \geq 3$  and  $T_1 \geq n^2$ . We also have

$$|T\lambda_i^\delta - \hat{\lambda}_i| \leq T\epsilon^\delta$$

So

$$\begin{aligned} |T\lambda_i - \hat{\lambda}_i| &\leq |T\lambda_i - T\lambda_i^\delta| + |T\lambda_i^\delta - \hat{\lambda}_i| \\ &\leq T \left( \frac{q^3n^4}{T_1} + \epsilon^\delta \right) \end{aligned}$$

If we want  $\frac{|T\lambda_i - \hat{\lambda}_i|}{T}$  to be equal to  $\epsilon$  we must choose  $T_1$  such that

$$\frac{|T\lambda_i - \hat{\lambda}_i|}{T} \leq \frac{q^3n^4}{T_1} + \epsilon^\delta$$

Therefore, to get the generalised eigenvalues to an error of  $\epsilon$  we must choose  $T, T_1$  such that

$$\begin{aligned} T &= \frac{q^2n^{\frac{5}{2}}}{\epsilon^\delta} \geq \frac{qn^{\frac{3}{2}}\|\hat{C}\|}{\epsilon^\delta} \\ T_1 &= \frac{q^3n^4}{\epsilon - \epsilon^\delta} \end{aligned}$$

Where  $\epsilon^\delta < \epsilon$ .

If we take  $\epsilon^\delta = \frac{\epsilon}{2}$ , then we have

$$\begin{aligned} T &= \frac{2q^2n^{\frac{5}{2}}}{\epsilon} \\ T_1 &= \frac{2q^3n^4}{\epsilon} \end{aligned}$$

And our total protocol is therefore, assuming  $q > n$ ,  $(n^2 \log(q^3n^4/\epsilon), \log(q^3n^4/\epsilon))$ .

## 1.4 Fingerprinting the Covariance Matrix

This algorithm provides a  $(d^2 \log(qn), \log(qn))$ -protocol for verification that  $A$  is indeed the covariance matrix scaled by  $n$ . The costs come from scaling by  $n$  and receiving  $A \in \mathbb{F}_{qn}^{d \times d}$ .

## References

Lloyd N Trefethen and David Bau III. *Numerical linear algebra*, volume 50. Siam, 1997.

---

**Algorithm 1:** Streaming Annotated COVARIANCEFINGERPRINT

---

**Input** :  $S \in \mathbb{F}_q^{d \times n}$

**Output:**  $f_x(A) = f_x((n-1)\text{Cov}(S))$  or  $\perp$

1 Choose  $x \in_R \mathbb{F}$

2 Whilst Streaming  $S$  column by column;

3 **for**  $S_j^\downarrow$  with  $j = 0$  **to**  $n - 1$  **do**

4     Construct the sum of each of these  $f_{x^n}(S_j^\downarrow)$ ,  $f_x(S_j^\downarrow)$ ,  $f_{x^n}(S_j^\downarrow)f_x(S_j^\downarrow)$ ,  
    $\sum_{i=0}^{d-1} S_{ij}x^n$  and  $\sum_{i=0}^{d-1} S_{ij}x^{ni}$  individually

5  $f_x(A) = \sum_j f_{x^n}(S_j^\downarrow)f_x(S_j^\downarrow) - \left[ \sum_j \sum_{i=0}^{d-1} S_{ij}x^n \right] \left[ \sum_j f_{x^n}(S_j^\downarrow) \right] -$   
    $\left[ \sum_j \sum_{i=0}^{d-1} S_{ij}x^{ni} \right] \left[ \sum_j f_x(S_j^\downarrow) \right] + n \left[ \sum_j \sum_{i=0}^{d-1} S_{ij}x^n \right] \left[ \sum_j \sum_{i=0}^{d-1} S_{ij}x^{ni} \right]$

6 Receive  $\hat{A}$  from the helper

7 **Check**

8      $f_x(A) == f_x(\hat{A})$

---
